# Supplementary material
Source: Royal Society of Chemistry journal article supplement (doi:10.1039/d6nj00053c)
Supplement: d6nj00053c1.pdf [file d6nj00053c1.pdf]

## Enhanced Biophysical, Electrochemical & Computational Recognition of Cancer-Relevant G-Quadruplex DNA by Ferrocenyl Curcumin Schiff Base Motifs

Padma Sharma<sup>a</sup>, Niki Sweta Jha<sup>a\*</sup>, Anupama Rai<sup>a</sup>, Suresh Tiwari<sup>b</sup>, Ranga Subramaniam<sup>b</sup>

<sup>a</sup>: Department of Chemical Science & Technology, National Institute of Technology, Patna-800005, India

<sup>b</sup>: Department of Chemistry, India Institute of Technology, Patna-800005, India

Correspondence: Niki Sweta Jha, Associate Professor, Department of Chemical Science & Technology, National Institute of Technology Patna, Ashok Rajpath, Patna- 800005; E-mail: [nikij@nitp.ac.in](mailto:nikij@nitp.ac.in)

### Supporting Information

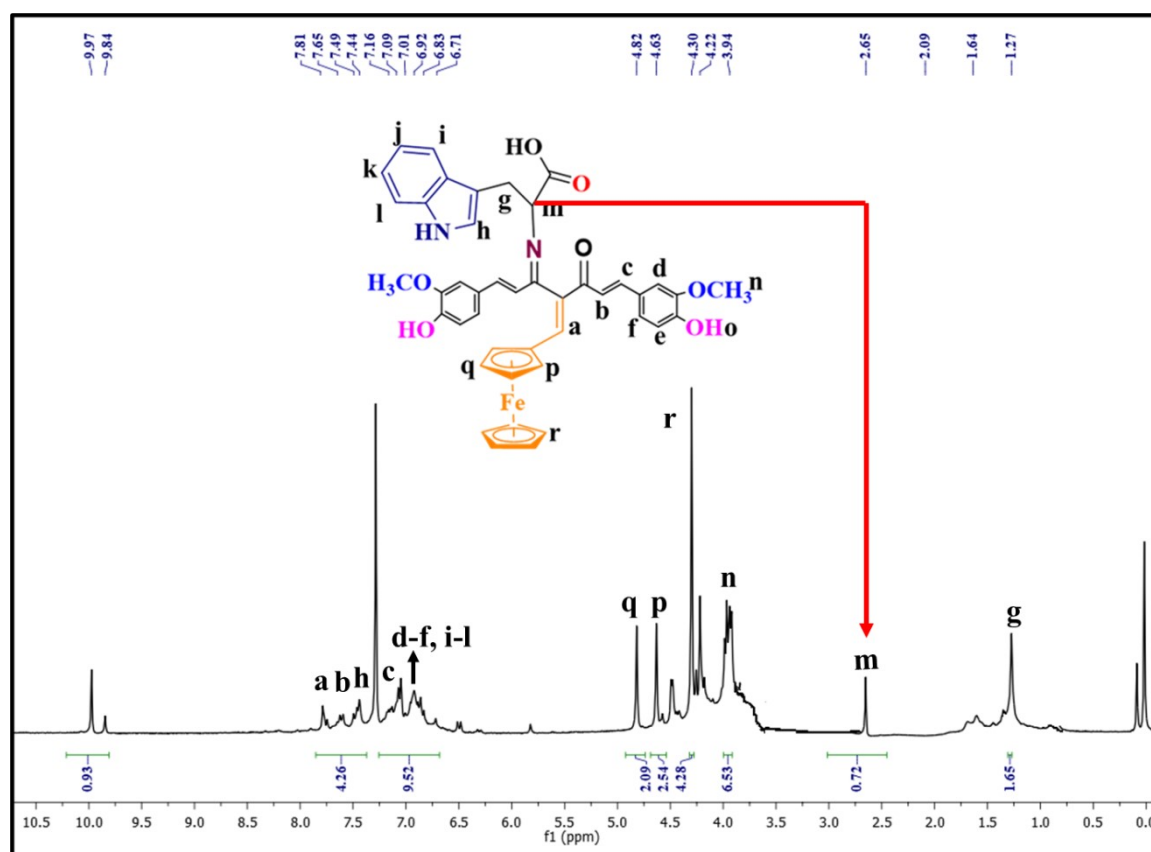

**Figure S1.** <sup>1</sup>H NMR spectra of synthesized compound Sb-Fc.

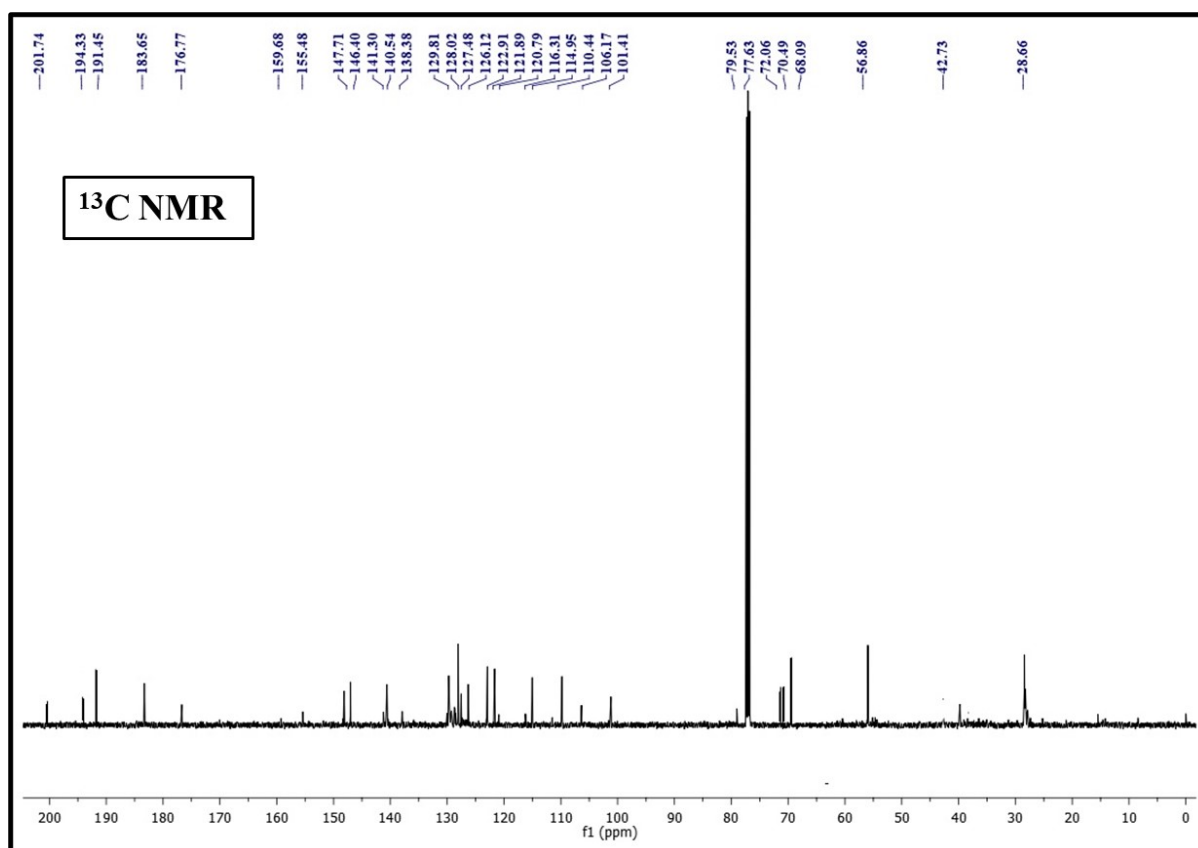

**Figure S2.** <sup>13</sup>C NMR of synthesized compound Sb-Fc.

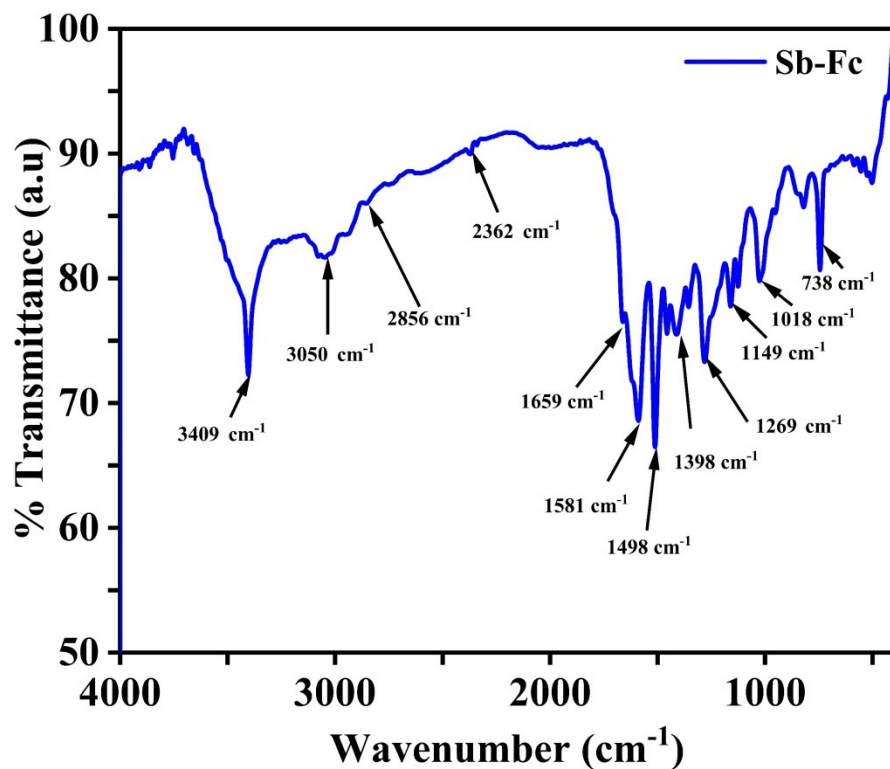

**Figure S3.** FT-IR spectra of synthesized compound Sb-Fc.

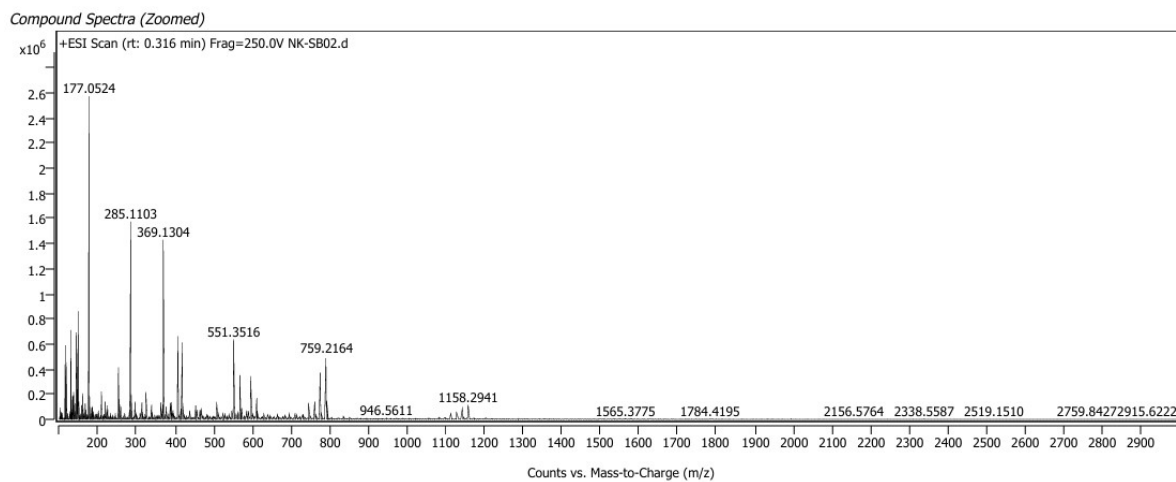

**Figure S4.** HR-MS of synthesized compound Sb-Fc.

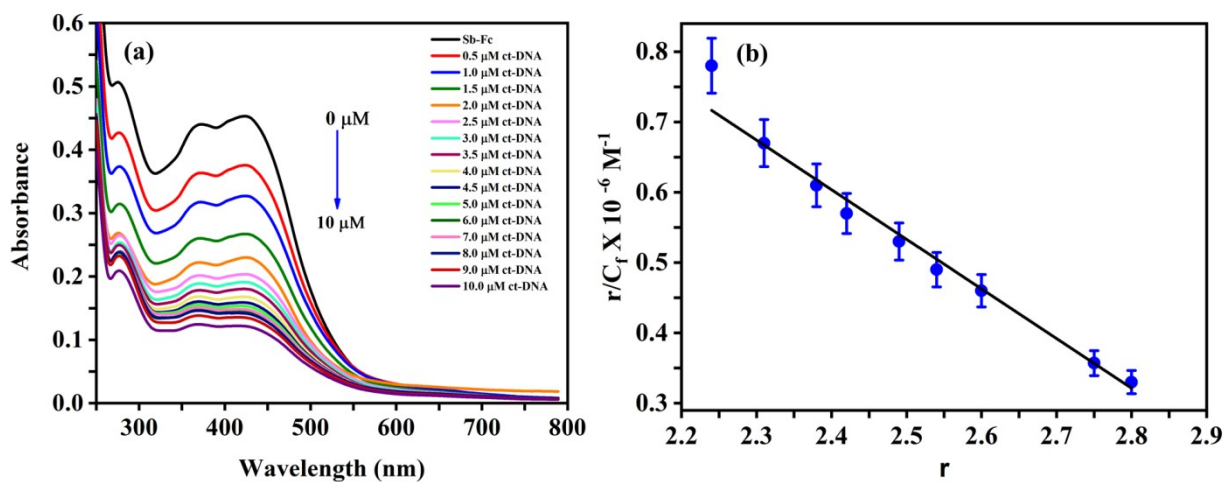

**Figure S5.** The absorption titration spectra of 10 μM (a) ct-DNA and (b) its Scatchard plot analysis of the interaction of Sb-Fc with 10 mM Tris buffer containing 0.01M KCl at pH 7.4.

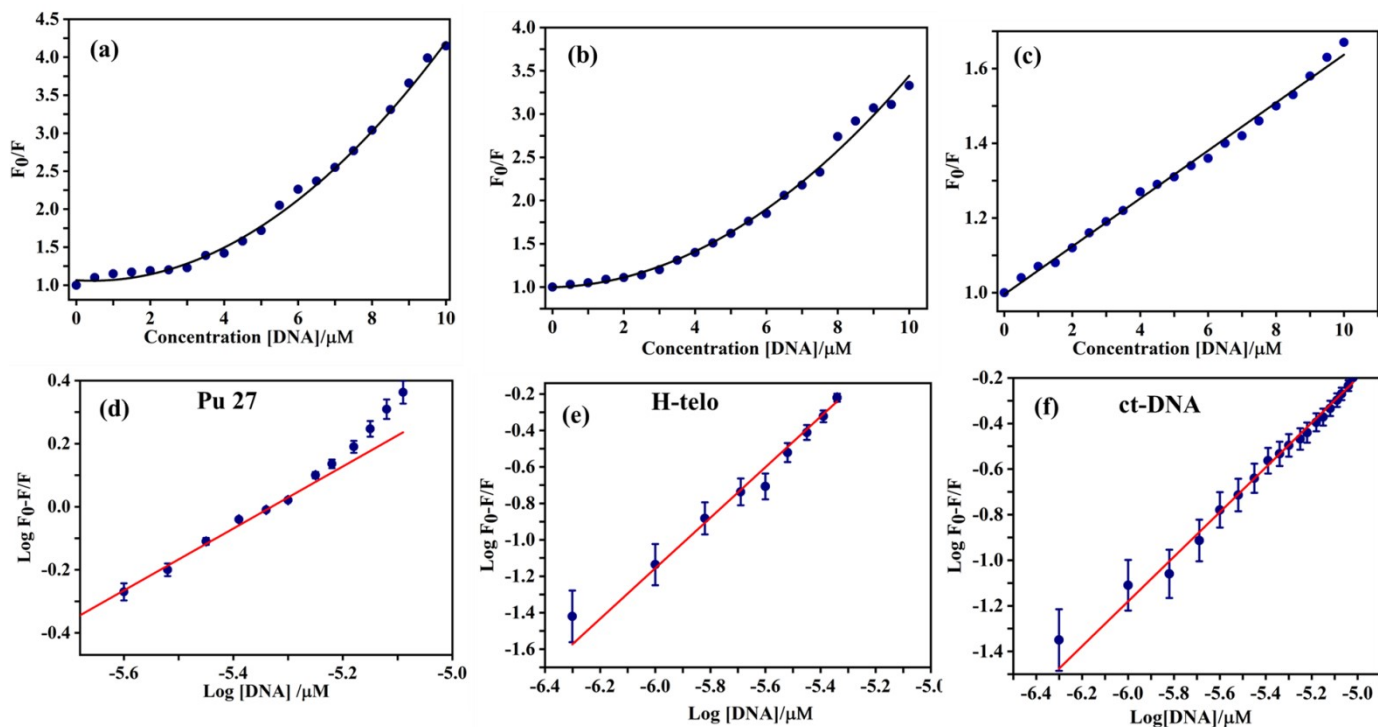

**Figure S6:** The variation of  $F_0/F$  vs DNA concentration and  $\text{log } (F_0-F/F)$  versus  $\text{log [DNA]}$  (a) Pu27, (b) H-telo, and (c) ct-DNA.

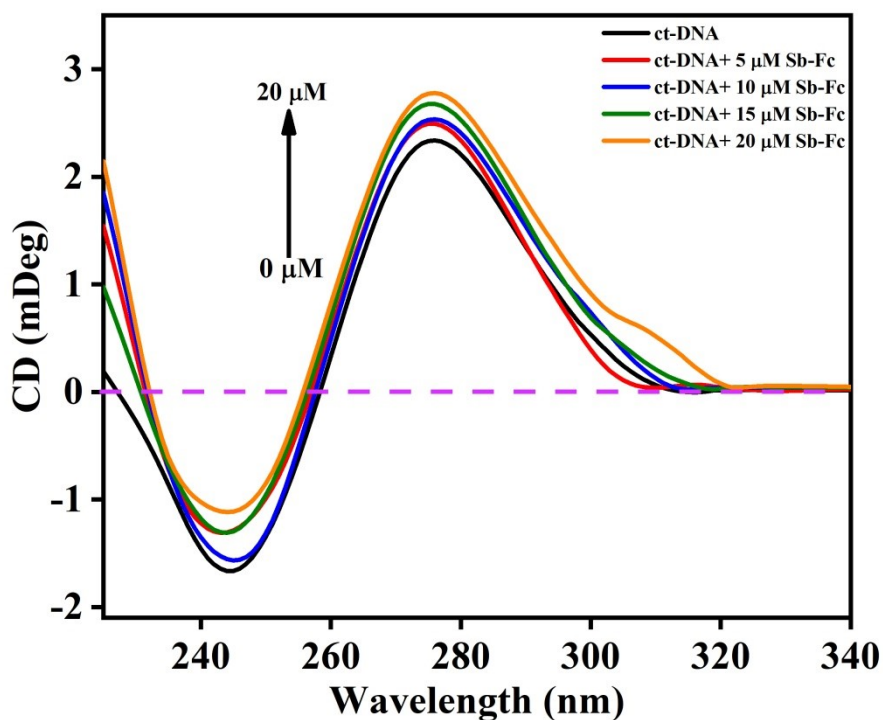

**Figure S7:** Circular Dichroism (CD) spectra of 10  $\mu\text{M}$  ct-DNA by subsequential addition of 0-20  $\mu\text{M}$  of synthesized schiff base (**Sb-Fc**) in 10 mM Tris buffer (pH 7.4), and 100 mM KCl.

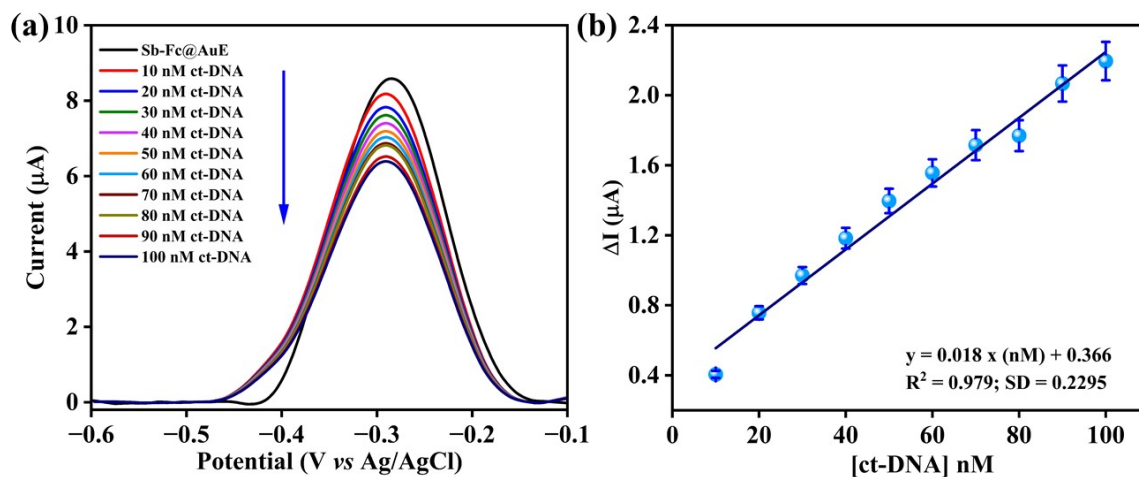

**Figure S8:** DPV curves obtained in 10 mM PBS buffer using Sb-Fc as probe for detection of ct-DNA, and calibration curve of DPV peak current decrease ( $I_0 - I$ ) with different ct-DNA.

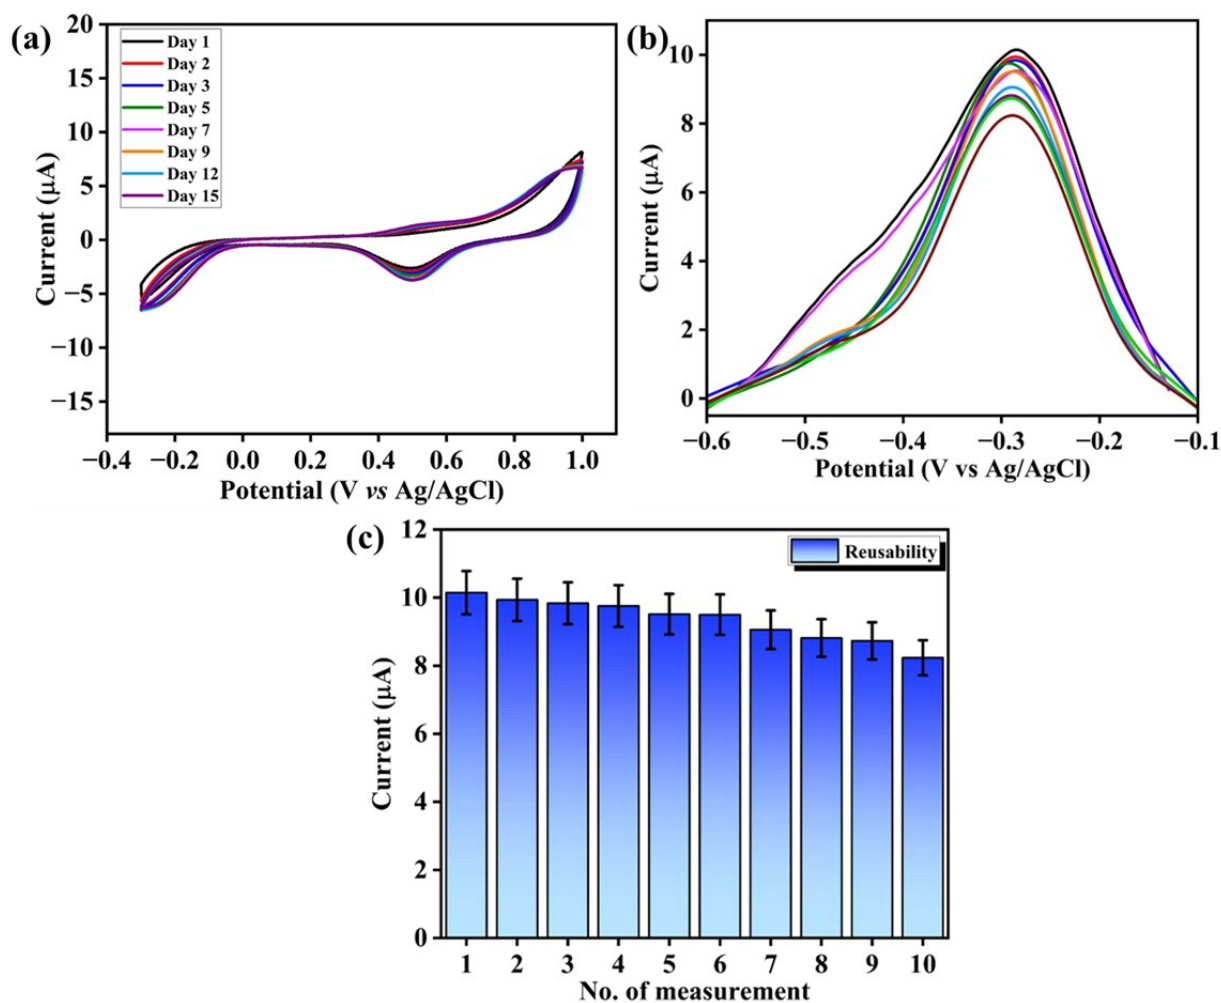

**Figure S9:** (a) Representative graph showing the stability of the Sb-Fc immobilized gold electrode over 15 days; (b) Differential pulse voltammetry (DPV) studies; and (c) representative bar graph illustrating the reusability of the Sb-Fc modified gold electrode for G-quadruplex sensing over 10 consecutive measurements.

## Computational Studies

### Curcumin-based ligands Coordinates:

|   |             |             |             |
|---|-------------|-------------|-------------|
| C | -2.22027100 | 1.09101000  | 3.30854400  |
| C | -1.21027200 | 0.54177100  | 2.51181600  |
| C | -0.81170200 | 1.16220500  | 1.33258200  |
| C | -1.41131300 | 2.36168500  | 0.91280000  |
| C | -2.41702500 | 2.90832800  | 1.73002900  |
| C | -2.82697900 | 2.29881300  | 2.91229400  |
| H | -0.74193600 | -0.39189900 | 2.81842600  |
| H | -0.03234300 | 0.69938300  | 0.73579400  |
| H | -2.90957500 | 3.83436200  | 1.44852900  |
| C | -1.04289900 | 3.06995000  | -0.31967800 |
| H | -1.62077100 | 3.96814600  | -0.52811900 |
| C | -0.05945200 | 2.75207300  | -1.17958700 |

|    |             |             |             |
|----|-------------|-------------|-------------|
| H  | 0.60286900  | 1.90913300  | -0.98318400 |
| C  | 0.29865200  | 3.54597000  | -2.39715300 |
| C  | 1.54685600  | 4.36898200  | -2.21378900 |
| C  | 1.29373100  | 5.58817800  | -1.38538600 |
| C  | 2.42203700  | 6.32465200  | -0.76904800 |
| H  | 3.41771700  | 5.89831300  | -0.81358400 |
| C  | 3.14885100  | 8.35297100  | 0.55341700  |
| C  | 4.51716900  | 8.05349900  | 0.67622900  |
| C  | 2.67227300  | 9.55464200  | 1.12605400  |
| C  | 5.38455400  | 8.91406500  | 1.34188600  |
| H  | 4.91189900  | 7.13785400  | 0.24874600  |
| C  | 3.53490600  | 10.41481200 | 1.78927700  |
| H  | 1.61840400  | 9.79395800  | 1.03660200  |
| C  | 4.90532700  | 10.09740100 | 1.90194900  |
| O  | -3.86002700 | 2.86032600  | 3.62054700  |
| C  | -3.54157400 | 3.32708600  | 4.93433700  |
| H  | -4.45333700 | 3.78799600  | 5.31980500  |
| H  | -3.24025200 | 2.50720500  | 5.59272300  |
| H  | -2.74413000 | 4.08074900  | 4.89866900  |
| O  | -2.65939400 | 0.49767800  | 4.45913000  |
| H  | -2.16428500 | -0.32029100 | 4.59713200  |
| C  | 2.97690300  | -0.08999500 | -1.68735100 |
| H  | 1.90965100  | -0.26370500 | -1.69524100 |
| C  | 3.66135800  | 0.93433500  | -0.96510400 |
| H  | 3.20233000  | 1.68331700  | -0.33400200 |
| C  | 5.05253400  | 0.83899100  | -1.27292500 |
| H  | 5.83180200  | 1.49036700  | -0.90178700 |
| C  | 3.94653100  | -0.82006000 | -2.44082100 |
| H  | 3.73994300  | -1.63856000 | -3.11647700 |
| C  | 5.22829400  | -0.24684500 | -2.18377700 |
| H  | 6.16329100  | -0.55685900 | -2.62998900 |
| C  | 2.54787400  | 2.00962900  | -4.30509000 |
| H  | 1.48158800  | 1.84373000  | -4.30873800 |
| C  | 3.25277400  | 3.05419300  | -3.61000400 |
| C  | 4.65194200  | 2.90269300  | -3.92924200 |
| H  | 5.44968500  | 3.52396100  | -3.54337600 |
| C  | 3.49885800  | 1.25232100  | -5.04206600 |
| H  | 3.27268500  | 0.38822500  | -5.65158600 |
| C  | 4.79877900  | 1.79813200  | -4.81003400 |
| H  | 5.73064600  | 1.41975100  | -5.20720900 |
| Fe | 3.95812200  | 1.17751700  | -3.00933000 |
| O  | 0.12682000  | 5.96349700  | -1.21747800 |
| N  | -0.33560500 | 3.61308000  | -3.50373900 |
| C  | -1.53101400 | 1.89901000  | -4.75630900 |
| O  | -0.51746000 | 1.38114700  | -5.17244600 |
| O  | -2.75691400 | 1.50241700  | -5.18281100 |
| H  | -2.59147400 | 0.79303300  | -5.82635800 |
| C  | -1.83480300 | 6.04068500  | -5.37486400 |
| C  | -2.02529700 | 6.45074300  | -6.72289500 |
| C  | -1.44983900 | 7.61607500  | -7.24145400 |

|   |             |             |             |
|---|-------------|-------------|-------------|
| C | -0.67201600 | 8.38209800  | -6.38093300 |
| C | -0.47175900 | 7.99533400  | -5.03930400 |
| C | -1.04021100 | 6.83480000  | -4.52877100 |
| C | -2.57845200 | 4.81560400  | -5.19125400 |
| H | -1.60500300 | 7.91177600  | -8.27573100 |
| H | -0.20966900 | 9.29360200  | -6.74961300 |
| H | 0.14558900  | 8.61560900  | -4.39556500 |
| H | -0.86371500 | 6.53930600  | -3.49916800 |
| H | -3.15297800 | 5.53671800  | -8.28049100 |
| C | -3.17197600 | 4.53957800  | -6.39918300 |
| H | -3.81540800 | 3.71516100  | -6.67160700 |
| N | -2.84133300 | 5.51280300  | -7.32401200 |
| C | -2.72606000 | 4.01218300  | -3.92971200 |
| H | -2.73223500 | 4.68233100  | -3.06337400 |
| H | -3.68580200 | 3.48710100  | -3.93324100 |
| C | -1.62009400 | 2.95206100  | -3.65980700 |
| H | -1.92588400 | 2.38863700  | -2.76256000 |
| C | 2.19255200  | 7.49281200  | -0.13216800 |
| H | 1.15721700  | 7.83163400  | -0.13301100 |
| C | 2.77336800  | 4.10662100  | -2.72766800 |
| H | 3.55937100  | 4.81303500  | -2.47089900 |
| O | 3.19811400  | 11.60618800 | 2.38408500  |
| C | 1.84275700  | 12.02830900 | 2.32179100  |
| H | 1.79760800  | 12.98503400 | 2.84373200  |
| H | 1.51552300  | 12.16399500 | 1.28374500  |
| H | 1.17906000  | 11.31066300 | 2.81940300  |
| O | 5.74930900  | 10.93812200 | 2.55103500  |
| H | 5.22060800  | 11.69168100 | 2.85775000  |
| H | 6.44104200  | 8.68736200  | 1.43951200  |

**Table S1.** Theoretically Calculated Gas-Phase Vibrational Frequencies of the Sb-Fc Compound at the B3LYP/6-31G(d,p)/LANL2DZ level of theory with scaling factor (0.9608).

| <b>Frequencies</b> | <b>IR intensity</b> |
|--------------------|---------------------|
| 5.47               | 0.0549              |
| 6.45               | 0.5165              |
| 10.25              | 0.8173              |
| 11.23              | 0.0351              |
| 12.86              | 0.1221              |
| 15.63              | 0.2148              |
| 18.63              | 0.7257              |
| 23.44              | 0.2472              |
| 30.49              | 0.2165              |
| 30.74              | 0.1188              |
| 34.86              | 0.0811              |
| 44.87              | 0.2166              |
| 48.38              | 0.1955              |
| 51.57              | 0.5305              |
| 60.42              | 1.2746              |

|        |         |
|--------|---------|
| 63.38  | 1.212   |
| 68.24  | 4.9793  |
| 73.45  | 2.445   |
| 78.2   | 1.2782  |
| 79.46  | 2.5013  |
| 83.73  | 1.9254  |
| 97.33  | 2.822   |
| 107.2  | 2.1561  |
| 116.06 | 0.157   |
| 127.88 | 3.7717  |
| 130.32 | 0.8726  |
| 141.54 | 0.877   |
| 151.96 | 2.1314  |
| 157.76 | 0.153   |
| 167.26 | 1.769   |
| 167.71 | 0.8728  |
| 170.91 | 0.2389  |
| 180.57 | 2.9539  |
| 210.13 | 3.0636  |
| 215.43 | 8.0025  |
| 218.25 | 1.553   |
| 218.71 | 1.3091  |
| 221.9  | 1.2615  |
| 228.79 | 1.2026  |
| 241.4  | 6.2097  |
| 260.84 | 0.5447  |
| 272.21 | 1.2161  |
| 279    | 0.9109  |
| 281.23 | 1.2017  |
| 288.64 | 7.9169  |
| 290.42 | 15.36   |
| 315.77 | 11.66   |
| 324.67 | 4.5892  |
| 325.94 | 25.3012 |
| 332.15 | 12.2005 |
| 333.6  | 68.5094 |
| 351.83 | 4.1119  |
| 356    | 16.1094 |
| 363.79 | 13.9108 |
| 368.15 | 18.7902 |
| 371.83 | 10.5697 |
| 387.73 | 5.4028  |
| 410    | 44.3694 |
| 422.89 | 1.5225  |
| 425.93 | 5.6691  |
| 429.75 | 18.2033 |
| 433.97 | 32.072  |
| 440.07 | 20.8425 |

|        |         |
|--------|---------|
| 442.4  | 9.375   |
| 443.74 | 12.5743 |
| 450.13 | 2.3905  |
| 473.03 | 2.2088  |
| 473.95 | 91.8188 |
| 480.37 | 30.2878 |
| 491.14 | 28.1538 |
| 519.14 | 4.362   |
| 527.42 | 11.3204 |
| 538.77 | 3.9093  |
| 541.05 | 12.543  |
| 542.61 | 12.448  |
| 548.93 | 13.0348 |
| 549.34 | 1.1494  |
| 552.09 | 0.0545  |
| 560.01 | 9.7451  |
| 562.72 | 1.3109  |
| 570.33 | 7.2566  |
| 576.02 | 34.9612 |
| 579.92 | 21.2038 |
| 587.32 | 5.3292  |
| 603.24 | 7.5969  |
| 615.92 | 19.8289 |
| 622.1  | 24.385  |
| 626.3  | 3.137   |
| 649.64 | 62.056  |
| 681.75 | 1.2666  |
| 687.65 | 13.0791 |
| 693.86 | 28.91   |
| 702.88 | 10.4467 |
| 708.59 | 15.7737 |
| 717.16 | 24.4218 |
| 726.16 | 10.7763 |
| 727.99 | 56.8865 |
| 732.36 | 8.3962  |
| 742.07 | 6.539   |
| 751.58 | 3.9285  |
| 765.39 | 5.5571  |
| 774.61 | 21.4235 |
| 776.7  | 4.8422  |
| 779    | 1.1185  |
| 784.02 | 16.5724 |
| 786.78 | 2.0959  |
| 789.81 | 51.5599 |
| 797.33 | 15.6345 |
| 802.72 | 7.8208  |
| 805.51 | 7.2683  |
| 808.88 | 7.0306  |

|         |          |
|---------|----------|
| 811.89  | 0.606    |
| 814.62  | 10.8583  |
| 818.34  | 4.6751   |
| 823.99  | 7.062    |
| 826.13  | 10.0034  |
| 827.02  | 12.1977  |
| 831.85  | 23.9652  |
| 843.17  | 2.7128   |
| 845.98  | 0.1911   |
| 850.22  | 0.4504   |
| 852.29  | 0.6138   |
| 852.72  | 3.767    |
| 870.41  | 3.9725   |
| 881.05  | 15.3675  |
| 884.82  | 9.3381   |
| 888.37  | 3.8825   |
| 891.5   | 0.4048   |
| 899.89  | 2.636    |
| 904.67  | 1.6251   |
| 908.48  | 9.8007   |
| 911.19  | 14.61    |
| 916.33  | 13.8007  |
| 922.2   | 11.0917  |
| 941.51  | 24.3997  |
| 945.53  | 3.906    |
| 959.77  | 48.4684  |
| 965.3   | 9.7588   |
| 986.46  | 7.8331   |
| 988.45  | 4.8823   |
| 991.7   | 17.2447  |
| 1001.36 | 7.7975   |
| 1014.34 | 65.4954  |
| 1021.85 | 8.1611   |
| 1026.7  | 46.8753  |
| 1030.5  | 1.6658   |
| 1036.36 | 35.8566  |
| 1037.15 | 7.8401   |
| 1037.83 | 49.2477  |
| 1047.08 | 45.842   |
| 1047.87 | 64.6836  |
| 1068.36 | 32.2953  |
| 1084.85 | 90.1829  |
| 1089.88 | 10.7493  |
| 1095.14 | 106.7168 |
| 1105.69 | 33.1223  |
| 1109.33 | 13.4078  |
| 1124.36 | 250.7042 |
| 1132.01 | 0.5544   |

|         |          |
|---------|----------|
| 1132.32 | 4.1135   |
| 1136.08 | 49.8172  |
| 1145.8  | 91.4104  |
| 1147.61 | 30.6594  |
| 1153.04 | 136.2169 |
| 1155.63 | 239.3813 |
| 1169.92 | 11.0828  |
| 1173.06 | 38.0008  |
| 1186.79 | 2.8413   |
| 1187.6  | 191.5634 |
| 1193.38 | 6.8344   |
| 1205.58 | 20.5026  |
| 1217.27 | 86.2044  |
| 1224.41 | 268.6986 |
| 1225.55 | 70.2183  |
| 1237.12 | 17.8644  |
| 1241.69 | 0.1759   |
| 1243.77 | 2.8723   |
| 1249.15 | 60.618   |
| 1263.58 | 75.736   |
| 1264.13 | 354.1434 |
| 1272.84 | 2.0663   |
| 1277.28 | 9.1425   |
| 1278.21 | 89.6128  |
| 1281.07 | 337.6019 |
| 1294.61 | 29.7766  |
| 1297.72 | 45.8875  |
| 1300.36 | 11.1563  |
| 1318.33 | 29.2317  |
| 1320.84 | 20.9969  |
| 1326.3  | 75.1143  |
| 1328.59 | 22.5984  |
| 1334.54 | 32.6508  |
| 1337.01 | 5.1121   |
| 1341.87 | 4.8292   |
| 1358.08 | 15.0524  |
| 1361.7  | 12.6631  |
| 1368.83 | 34.8003  |
| 1376.42 | 26.9283  |
| 1394.58 | 25.7623  |
| 1396.76 | 22.5987  |
| 1401.87 | 18.5184  |
| 1405.65 | 1.9462   |
| 1406.02 | 1.0453   |
| 1412.29 | 13.364   |
| 1429.73 | 8.8318   |
| 1432.81 | 7.1278   |
| 1437.21 | 37.7522  |

|         |          |
|---------|----------|
| 1437.57 | 22.1205  |
| 1439.3  | 5.1953   |
| 1441.45 | 6.5889   |
| 1442.8  | 26.6361  |
| 1458.28 | 56.9624  |
| 1464.01 | 10.2848  |
| 1474.51 | 4.8139   |
| 1499.08 | 172.6245 |
| 1502.09 | 435.1771 |
| 1537.04 | 20.328   |
| 1562.64 | 614.6756 |
| 1566.15 | 18.6834  |
| 1572.37 | 44.5925  |
| 1583.73 | 63.9792  |
| 1594.05 | 40.5478  |
| 1598    | 26.0368  |
| 1604    | 239.7692 |
| 1608.21 | 5.5327   |
| 1627.7  | 34.6815  |
| 1640.99 | 160.6936 |
| 1652.07 | 150.4042 |
| 1761.05 | 271.3198 |
| 2865.35 | 24.9532  |
| 2905.42 | 41.6292  |
| 2906.22 | 69.4794  |
| 2939.71 | 21.0089  |
| 2967.85 | 31.2009  |
| 2984.3  | 39.8776  |
| 2985.06 | 14.6574  |
| 3021.58 | 24.5953  |
| 3023.7  | 9.0566   |
| 3029.97 | 27.1139  |
| 3035.75 | 22.3041  |
| 3038.32 | 1.2435   |
| 3041.18 | 12.3418  |
| 3046.78 | 0.2334   |
| 3046.95 | 7.5309   |
| 3056.97 | 30.3458  |
| 3069.79 | 30.9457  |
| 3073.23 | 9.3009   |
| 3074.04 | 4.3497   |
| 3075.56 | 5.6634   |
| 3080.78 | 5.1066   |
| 3083.9  | 1.8044   |
| 3086.08 | 8.56     |
| 3090.55 | 9.9695   |
| 3111.17 | 1.4481   |
| 3114.88 | 0.1904   |

|         |          |
|---------|----------|
| 3116.55 | 0.2719   |
| 3122.26 | 6.7312   |
| 3128.78 | 11.7432  |
| 3130.02 | 8.1784   |
| 3134.43 | 7.5194   |
| 3137.38 | 1.2767   |
| 3140.46 | 1.6474   |
| 3159.08 | 60.8386  |
| 3544.88 | 73.1174  |
| 3603.29 | 63.0041  |
| 3611.96 | 168.7472 |
| 3670.44 | 69.3611  |

### S1. FMO Analysis:

A molecule's chemical activity is determined by its frontier molecular orbitals (FMO), especially its lowest unoccupied molecular orbital (LUMO) and its highest occupied molecular orbital (HOMO). These orbitals control a molecule's interactions with other species.<sup>1</sup> One crucial measurement of chemical reactivity is the energy gap between the HOMO and LUMO; a smaller gap indicates stronger reactivity, greater polarizability, and lower kinetic stability—all of which are traits frequently found in soft molecules.<sup>2</sup> This work used the B3LYP/6-31G(d,p) and LANL2DZ levels of theory to compute the HOMO-LUMO energy gap of ligands UNK0. The frontier molecular orbital (FMO) analysis of the UNK0 ligand reveals that the highest occupied molecular orbital (HOMO) is predominantly spread across the tryptophan unit, underscoring its electron-donating characteristics. In contrast, the lowest unoccupied molecular orbital (LUMO) is chiefly situated on one side of the curcumin framework, with a slight contribution from the ferrocene moiety, indicating a charge transfer towards the acceptor region. This clear spatial division of frontier orbitals not only supports the behavior of intramolecular charge transfer but also confirms an effective donor-acceptor electrical configuration. The narrow FMO energy gap of 0.1120 eV suggests improved electron delocalization and molecular polarizability, which could enhance  $\pi$ - $\pi$  stacking and electrostatic interactions with nucleic acid base pairs, potentially resulting in more stable ligand-DNA interactions.

Additionally, TD-DFT calculations were performed to explore the electronic absorption properties of the Sb-Fc (UNK0) ligand and to compare them with the experimental UV-Vis spectrum. The simulated spectrum {**Figure S10(b)**} reveals a strong absorption band in the visible range, primarily resulting from a HOMO  $\rightarrow$  LUMO transition with significant  $\pi$ - $\pi^*$

and intramolecular charge-transfer (ICT) characteristics, aligning with the donor–acceptor electronic structure identified by FMO analysis. Experimentally, the Sb-Fc (UNK0) ligand shows a shoulder band at 365 nm and a prominent absorption peak at 425 nm, attributed to  $\pi$ – $\pi^*$  transitions within the conjugated curcumin framework, along with contributions from aromatic and azomethine chromophores. The red shift observed in the calculated spectrum compared to the experimental one is mainly due to the gas-phase approximation used in TD-DFT calculations, which does not account for solvent and environmental effects. Nonetheless, the computed results capture the overall spectral features and confirm effective electronic delocalization and charge-transfer behaviour within the ligand framework.

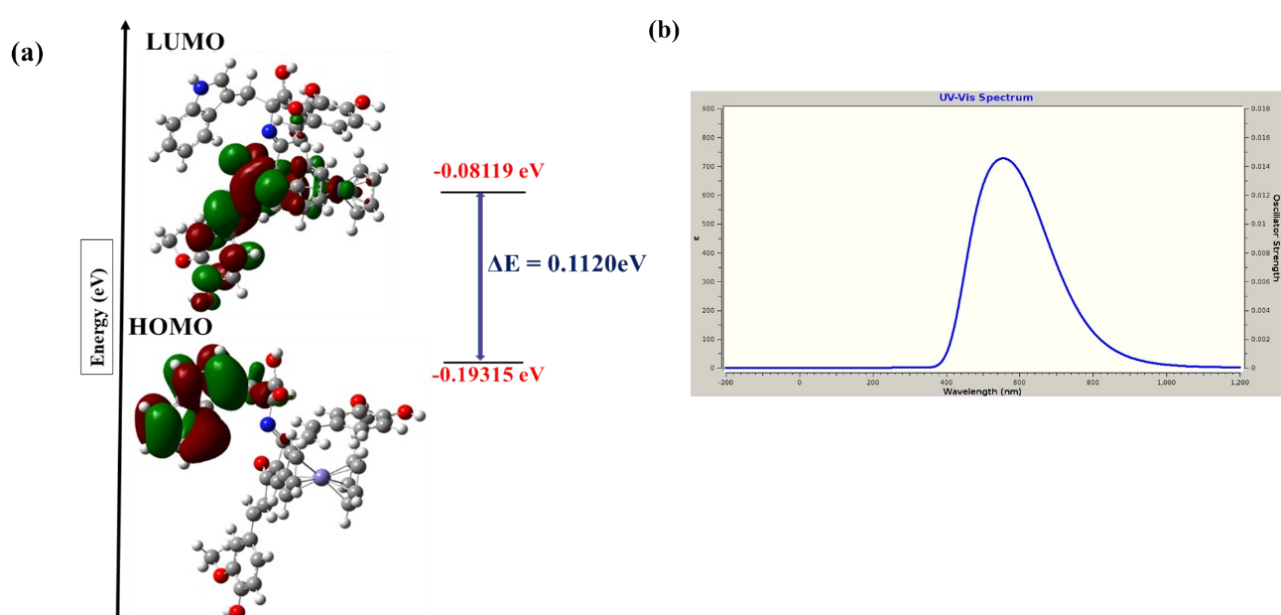

**Figure S10.** (a) FMO and (b) TD-DFT of UNK0 were obtained from the B3LYP/6-31G(d,p) and LANL2DZ level of theory.

## S2. Molecular Electrostatic Potential (MEP) Analysis:

A three-dimensional molecular electrostatic potential (MEP) map graphically represents the charge distribution within a molecule. By highlighting areas of positive and negative charge, these graphical representations offer information on the molecule's size, structure, and possible reactive sites. Understanding molecular interactions and reactivity is aided by the ability to forecast potential interactions between molecules through the analysis of the charge distribution<sup>3-4</sup>. **Figure S11** presents the areas of negative and positive charge in the Sb-Fc (UNK0) complex being studied. In **Figure S11**, the molecular electrostatic potential (ESP) surface of the Sb-Fc (UNK0) ligand is shown, highlighting the spatial distribution of electrostatic charge throughout the molecular structure. The colour scale transitions from

blue, indicating positive electrostatic potential and electron-deficient areas, through green and yellow, representing neutral potential, to red, which signifies negative electrostatic potential and electron-rich areas. The red zones are primarily concentrated around the carbonyl oxygen, phenolic oxygen, and azomethine nitrogen atoms of the curcumin component, marking these as favourable sites for hydrogen bonding and nucleophilic interactions. Conversely, blue regions are mostly found over hydrogen atoms and parts of the indole and ferrocene units, suggesting potential sites for electrophilic interactions. The clear distinction between electron-rich and electron-deficient areas reveals a significant donor-acceptor electronic distribution, which supports intramolecular charge transfer within the conjugated system. This electrostatic polarization is anticipated to enhance ligand stabilization through groove binding and  $\pi$ - $\pi$  stacking interactions with DNA base pairs. Overall, the ESP analysis confirms efficient charge separation and provides electrostatic evidence for the experimentally observed optical behaviour and binding capability of the Sb-Fc (UNK0) ligand.

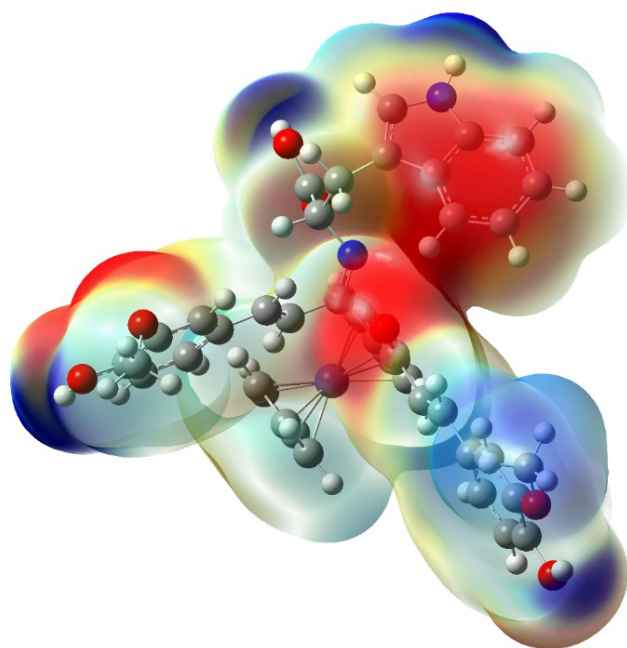

**Figure S11:** Molecular electrostatic potential (MEP) map of UNK0 ligand in the ground state using B3LYP/6-31G(d,p) and LANL2DZ level of theory.

### Docking Analysis

#### 1). 2LBY:

$$\text{Estimated Free Energy of Binding} = -5.96 \text{ kcal/mol } [= (1) + (2) + (3) - (4)]$$

$$\text{Estimated Inhibition Constant, } K_i = 43.11 \text{ uM (micromolar) [Temperature} = 298.15 \text{ K]}$$

$$(1) \text{ Final Intermolecular Energy} = -11.03 \text{ kcal/mol}$$

$$\text{vdW} + \text{Hbond} + \text{desolv Energy} = -9.35 \text{ kcal/mol}$$

$$\text{Electrostatic Energy} = -1.68 \text{ kcal/mol}$$

$$(2) \text{ Final Total Internal Energy} = -4.46 \text{ kcal/mol}$$

$$(3) \text{ Torsional Free Energy} = +5.07 \text{ kcal/mol}$$

$$(4) \text{ Unbound System's Energy } [= (2)] = -4.46 \text{ kcal/mol}$$

## 2). 2HY9:

$$\text{Estimated Free Energy of Binding} = -5.72 \text{ kcal/mol } [= (1) + (2) + (3) - (4)]$$

$$\text{Estimated Inhibition Constant, } K_i = 64.28 \text{ } \mu\text{M} \text{ [Temperature} = 298.15 \text{ K]}$$

$$(1) \text{ Final Intermolecular Energy} = -10.79 \text{ kcal/mol}$$

$$\text{vdW} + \text{Hbond} + \text{desolv Energy} = -10.55 \text{ kcal/mol}$$

$$\text{Electrostatic Energy} = -0.24 \text{ kcal/mol}$$

$$(2) \text{ Final Total Internal Energy} = -6.90 \text{ kcal/mol}$$

$$(3) \text{ Torsional Free Energy} = +5.07 \text{ kcal/mol}$$

$$(4) \text{ Unbound System's Energy } [= (2)] = -6.90 \text{ kcal/mol}$$

## 3). 1BNA:

$$\text{Estimated Free Energy of Binding} = -5.06 \text{ kcal/mol } [= (1) + (2) + (3) - (4)]$$

$$\text{Estimated Inhibition Constant, } K_i = 193.93 \text{ } \mu\text{M} \text{ [Temperature} = 298.15 \text{ K]}$$

$$(1) \text{ Final Intermolecular Energy} = -10.14 \text{ kcal/mol}$$

$$\text{vdW} + \text{Hbond} + \text{desolv Energy} = -11.23 \text{ kcal/mol}$$

$$\text{Electrostatic Energy} = +1.09 \text{ kcal/mol}$$

$$(2) \text{ Final Total Internal Energy} = -6.21 \text{ kcal/mol}$$

$$(3) \text{ Torsional Free Energy} = +5.07 \text{ kcal/mol}$$

$$(4) \text{ Unbound System's Energy } [= (2)] = -6.21 \text{ kcal/mol}$$

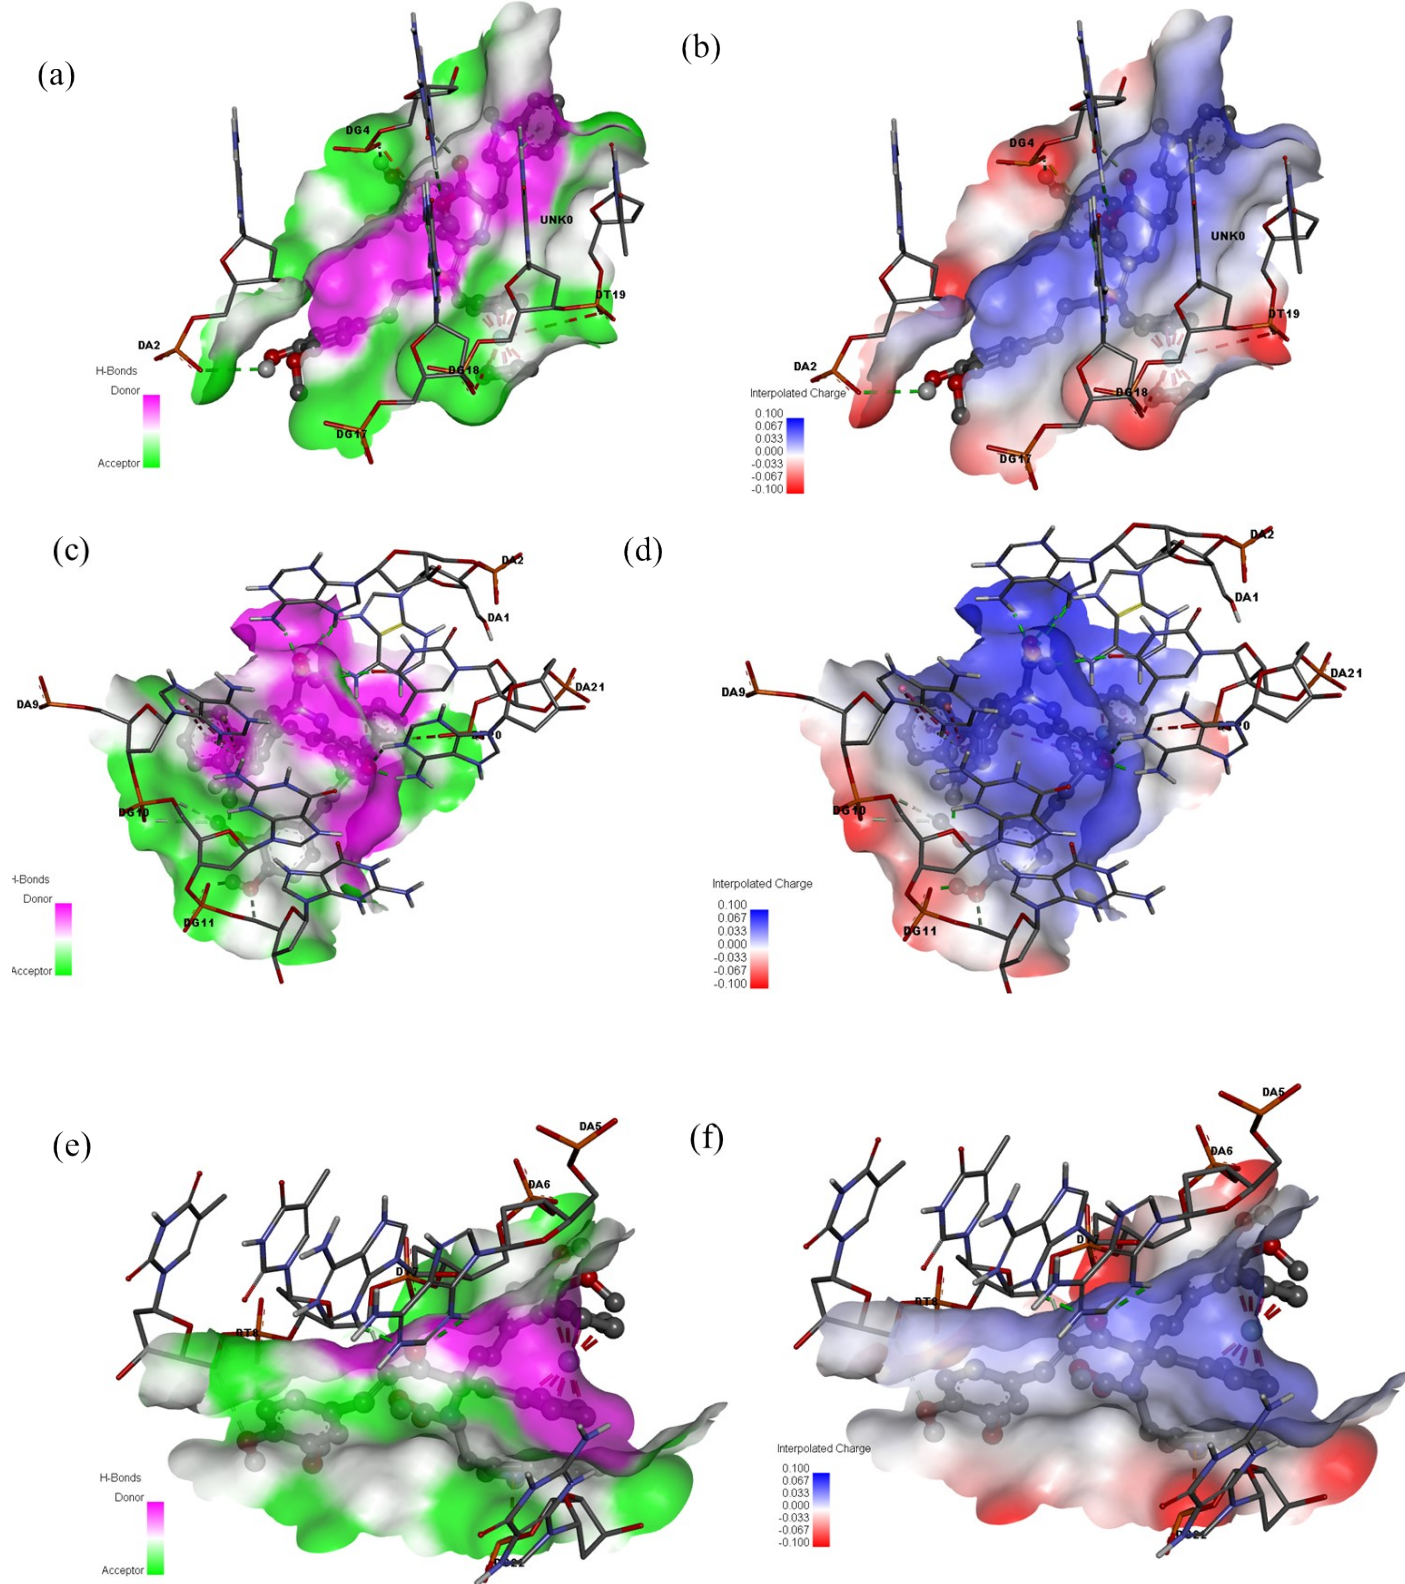

**Figure S12:** (a) H-bonds surface area of 2LBY with ligand Sb-Fc (UNK0), (b) interpolated charge surface area between ligand Sb-Fc (UNK0) and 2LBY. (c) H-bonds surface area of 2HY9 with ligand Sb-Fc (UNK0), (d) interpolated charge surface area between ligand UNK0 and 2HY9. (e) H-bonds surface area of 1BDNA with ligand UNK0, and (f) interpolated charge surface area between ligand UNK0 and 1BDNA.

## References

1. Prasad, O.; Sinha, L.; Misra, N.; Narayan, V.; Kumar, N.; Pathak, J., Molecular structure and vibrational study on 2, 3-dihydro-1H-indene and its derivative 1H-indene-1, 3 (2H)-dione by density functional theory calculations. *Journal of molecular structure: Theochem* **2010**, *940* (1-3), 82-86.
2. Fleming, I., Frontier orbitals and organic chemical reactions. *(No Title)* **1976**.
3. Mathammal, R.; Sangeetha, K.; Prasad, L. G.; Jayamani, V., Crystal growth, structural characterization and theoretical investigation on 3, 5-dinitrosalicylic acid monohydrate for nonlinear optical applications. *Spectrochimica Acta Part A: Molecular and Biomolecular Spectroscopy* **2015**, *144*, 200-214.
4. Scrocco, E.; Tomasi, J., Electronic molecular structure, reactivity, and intermolecular forces: an euristic interpretation by means of electrostatic molecular potentials. In *Advances in quantum chemistry*, Elsevier: 1978; Vol. 11, pp 115-193.
